# Supplementary material for: Tailoring the d-band center enables La doped ZnIn2S4 to be active for boosting photocatalytic activation of oxygen and degradation of antibiotics in wastewater
Source: Royal Society of Chemistry journal article supplement (doi:10.1039/d4qi00942h), 2024-01-01
Supplement: d4qi00942h1.pdf [file d4qi00942h1.pdf]

## Supplementary Information

### **Tailoring the d-band center enables La doped ZnIn<sub>2</sub>S<sub>4</sub> to be active for boosting photocatalytic activation of oxygen and degradation of antibiotic wastewater**

Yiwen Hu <sup>a</sup>, Xiao Ma <sup>a</sup>, Guoli Fan <sup>a\*</sup>, Lan Yang <sup>a</sup>, Feng Li <sup>a,b,\*</sup>

<sup>a</sup> State Key Laboratory of Chemical Resource Engineering, Beijing University of Chemical Technology, Box 98, Beijing 100029, China

<sup>b</sup> Beijing Advanced Innovation Center for Soft Matter Science and Engineering, Beijing University of Chemical Technology, Box 98, Beijing 100029, China

\* To whom all correspondence should be addressed

Tel.: 8610-64451226; Fax: 8610-64425385.

E-mail: [fangl@mail.buct.edu.cn](mailto:fangl@mail.buct.edu.cn) (G.L. Fan);

[Lifeng@mail.buct.edu.cn](mailto:Lifeng@mail.buct.edu.cn) (F. Li)

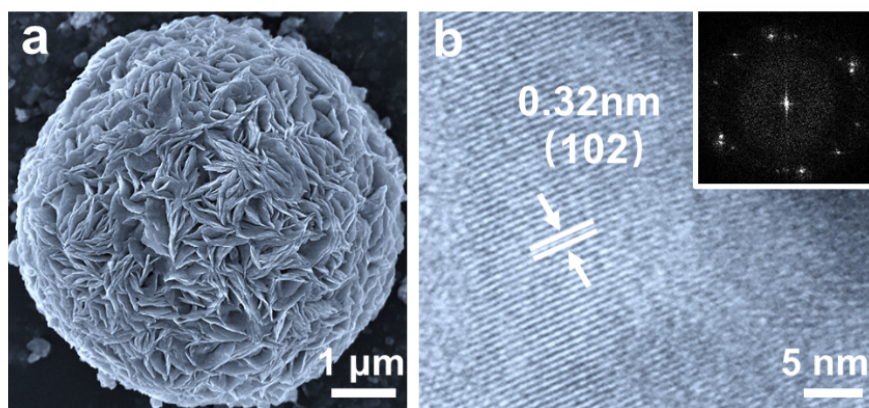

**Fig. S1** (a) FE-SEM image and (b) HRTEM image of ZIS.

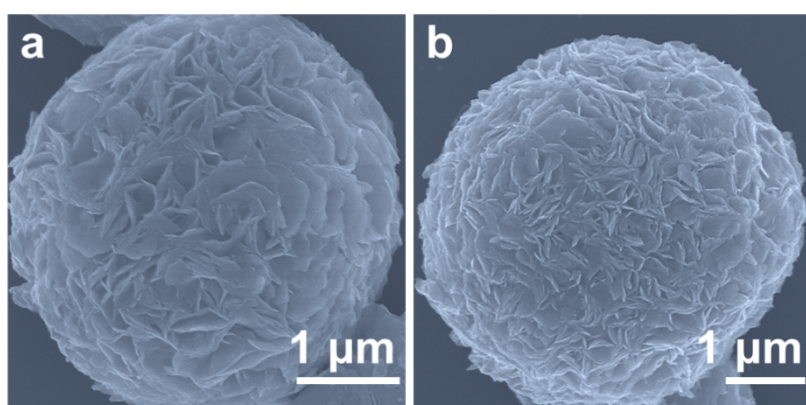

**Fig. S2** FE-SEM image of (a)  $\text{La}_{1.12}\text{-ZIS}$  and (b)  $\text{La}_{1.96}\text{-ZIS}$ .

**Table S1.** The weight percentage content of elements calculated from ICP-AES and atomic ratio of Zn : In in samples.

| Samples                       | Zn (wt%) | In (wt%) | La (wt%) | Atomic ratio (Zn:In) |
|-------------------------------|----------|----------|----------|----------------------|
| $\text{La}_{1.12}\text{-ZIS}$ | 11.88    | 36.79    | 1.12     | 0.3229               |
| $\text{La}_{1.37}\text{-ZIS}$ | 11.45    | 36.23    | 1.37     | 0.3160               |
| $\text{La}_{1.96}\text{-ZIS}$ | 10.77    | 36.58    | 1.96     | 0.2944               |

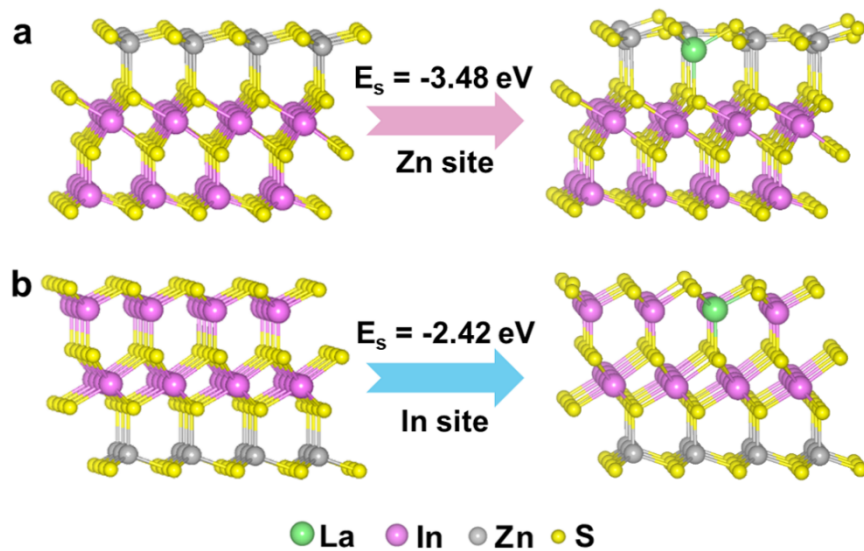

**Fig. S3** The formation energy of La atom for substitution of (a) Zn and (b) In sites.

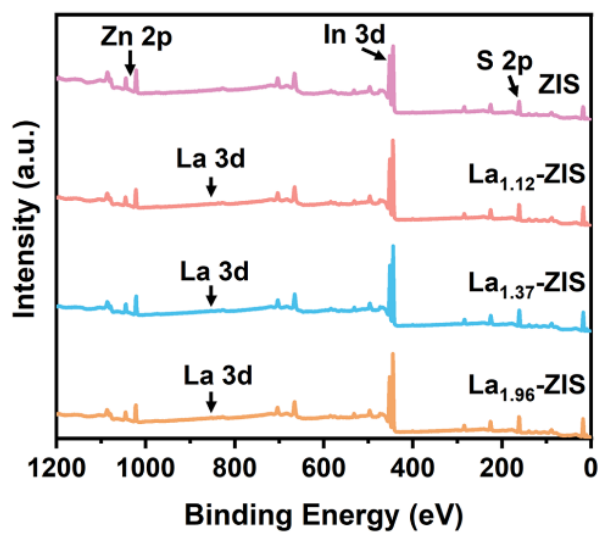

**Fig. S4** XPS survey spectra of ZIS and La<sub>x</sub>-ZIS.

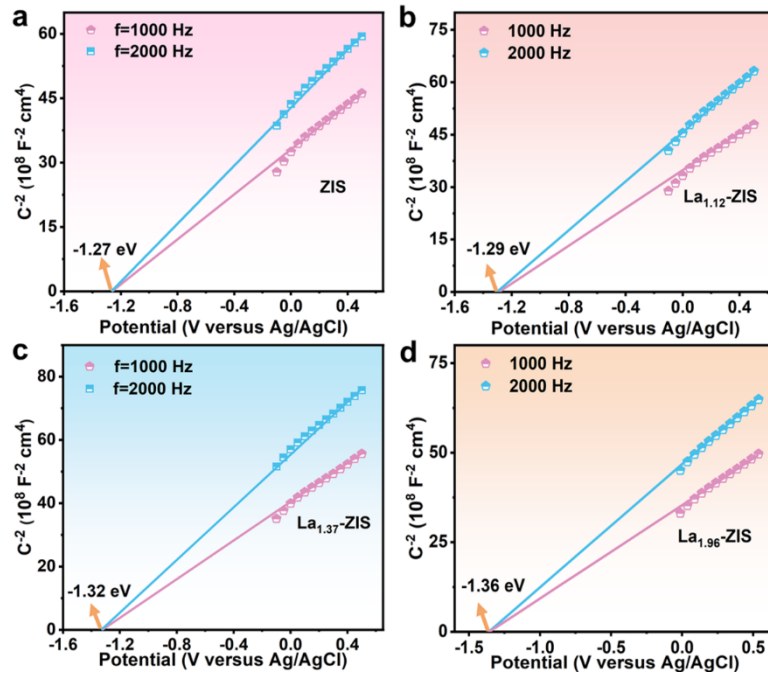

**Fig. S5** Mott-Schottky plots of (a) ZIS, (b)  $\text{La}_{1.12}\text{-ZIS}$ , (c)  $\text{La}_{1.37}\text{-ZIS}$  and (d)  $\text{La}_{1.96}\text{-ZIS}$ .

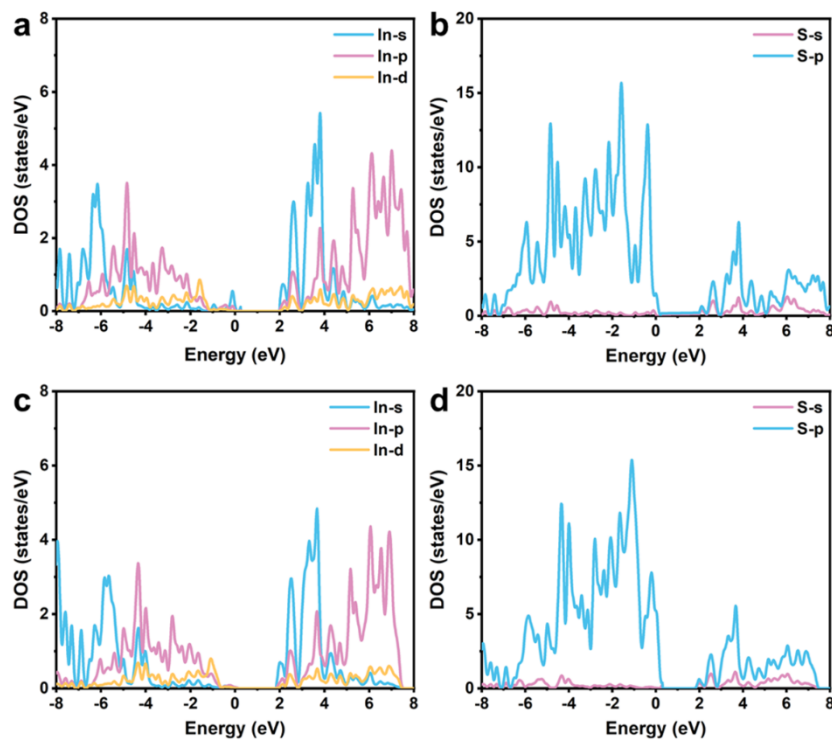

**Fig. S6** Calculated projected density of states of (a-b) ZIS and (c-d)  $\text{La}_{1.37}\text{-ZIS}$ .

**Table S2.** Kinetic parameters for the degradation of MNZ determined using pseudo-first-order model.

| Samples                 | Pseudo-first-order kinetic |                |
|-------------------------|----------------------------|----------------|
|                         | K (min <sup>-1</sup> )     | R <sup>2</sup> |
| ZIS                     | 0.0144                     | 0.9909         |
| La <sub>1.12</sub> -ZIS | 0.0286                     | 0.9940         |
| La <sub>1.37</sub> -ZIS | 0.0496                     | 0.9877         |
| La <sub>1.96</sub> -ZIS | 0.0206                     | 0.9944         |

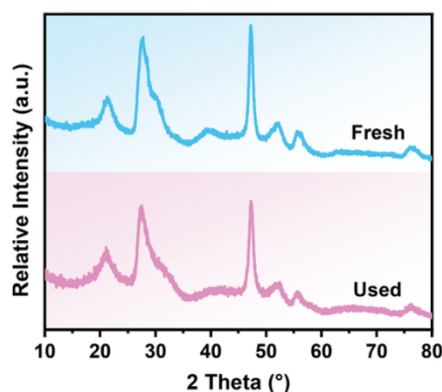

**Fig. S7** XRD patterns of La<sub>1.37</sub>-ZIS before and after cycling experiments.

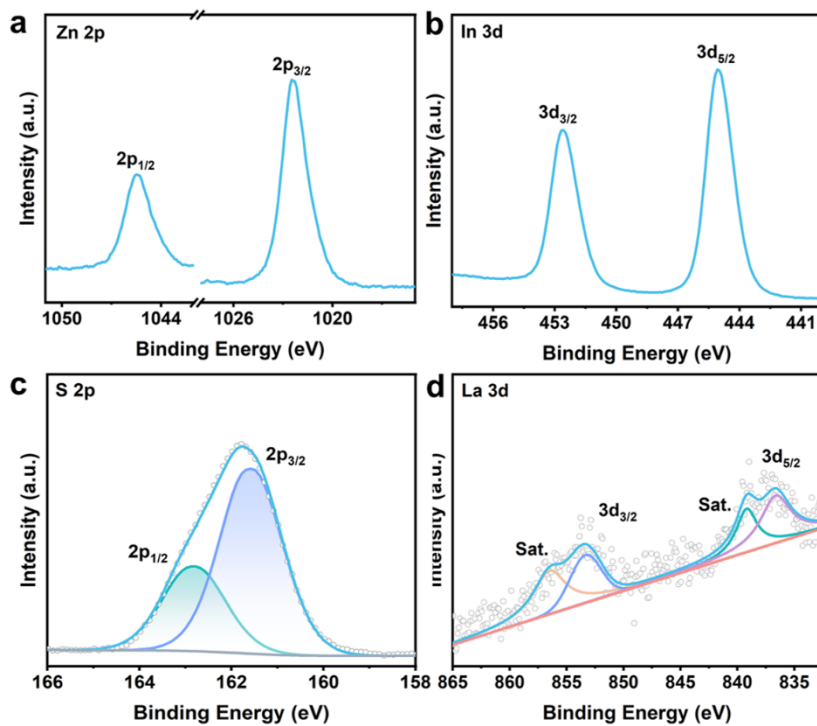

**Fig. S8** (a) Zn 2p, (b) In 3d, (c) S 2p and (d) La 3d XPS spectra of La<sub>1.37</sub>-ZIS after cycling experiments.

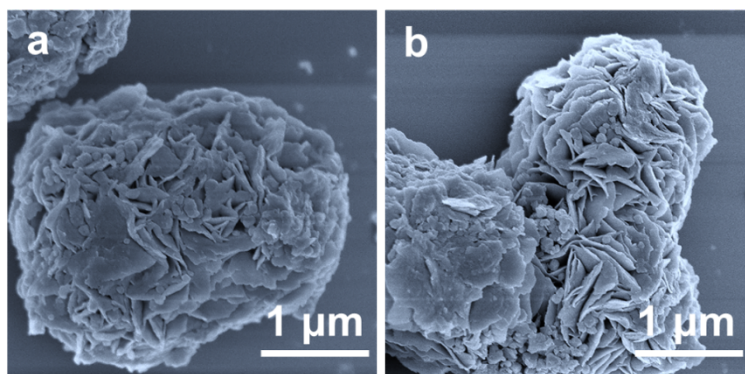

**Fig. S9** SEM images of La<sub>1.37</sub>-ZIS after cycling experiments.

**Table S3.** Kinetic parameters for the degradation of TCH determined using pseudo-first-order and pseudo-second-order model.

| Samples                 | Pseudo-first-order kinetic |         | Pseudo-second-order kinetic                    |         |
|-------------------------|----------------------------|---------|------------------------------------------------|---------|
|                         | $K_1$ (min <sup>-1</sup> ) | $R_1^2$ | $K_2$ (L·mg <sup>-1</sup> ·min <sup>-1</sup> ) | $R_2^2$ |
| P25                     | 0.0072                     | 0.9688  | 0.0033                                         | 0.9696  |
| ZIS                     | 0.0214                     | 0.9823  | 0.0186                                         | 0.9925  |
| La <sub>1.12</sub> -ZIS | 0.0305                     | 0.9597  | 0.0382                                         | 0.9852  |
| La <sub>1.37</sub> -ZIS | 0.0395                     | 0.9403  | 0.0643                                         | 0.9836  |
| La <sub>1.96</sub> -ZIS | 0.0294                     | 0.9757  | 0.0326                                         | 0.9944  |

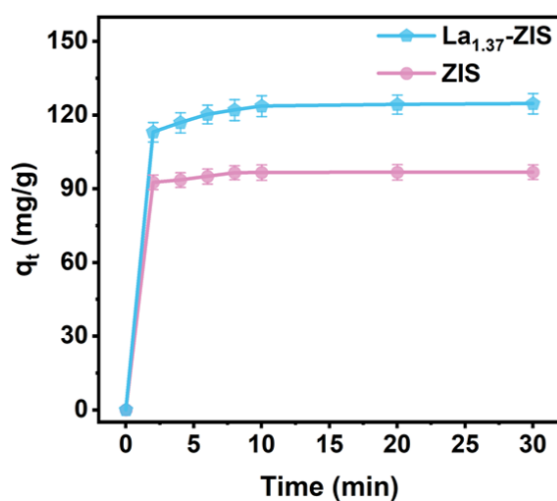

**Fig. S10** The adsorption-desorption equilibrium curves of TCH over ZIS and La<sub>1.37</sub>-ZIS.

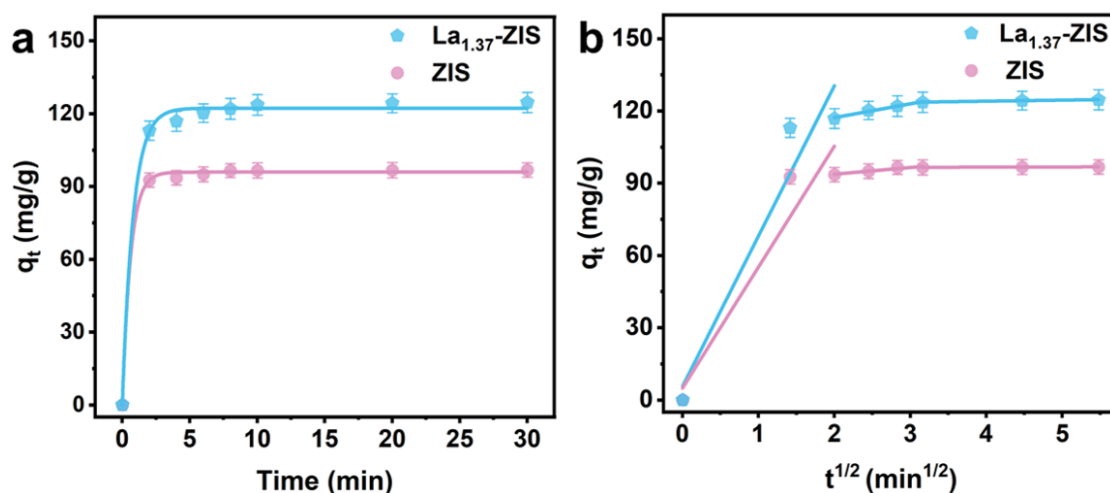

**Fig. S11** (a) The kinetics curves of pseudo-first-order model, (b) intra-particle model for TCH adsorption over ZIS and La<sub>1.37</sub>-ZIS.

**Table S4.** Kinetic parameters for adsorption of TCH over ZIS and La<sub>1.37</sub>-ZIS.

| Kinetic model           | Parameter                                               | ZIS    | La <sub>1.37</sub> -ZIS |
|-------------------------|---------------------------------------------------------|--------|-------------------------|
| Pseudo-first-order      | K <sub>1</sub> (min <sup>-1</sup> )                     | 1.6659 | 1.2542                  |
|                         | q <sub>e</sub> (mg·g <sup>-1</sup> )                    | 95.94  | 122.27                  |
|                         | R <sup>2</sup>                                          | 0.9988 | 0.9967                  |
| Pseudo-second-order     | K <sub>2</sub> (mg·min <sup>-1</sup> ·g <sup>-1</sup> ) | 0.0951 | 0.0335                  |
|                         | q <sub>e</sub> (mg·g <sup>-1</sup> )                    | 97.21  | 125.61                  |
|                         | R <sup>2</sup>                                          | 0.9997 | 0.9996                  |
| Intraparticle diffusion | K <sub>1dif</sub> (mg·g <sup>-1</sup> )                 | 50.26  | 62.44                   |
|                         | C <sub>1</sub> (mg·g <sup>-1</sup> ·min <sup>-1</sup> ) | 4.8917 | 5.6169                  |
|                         | R <sub>1</sub> <sup>2</sup>                             | 0.8470 | 0.8679                  |
|                         | K <sub>2dif</sub> (mg·g <sup>-1</sup> )                 | 2.7772 | 5.7261                  |
|                         | C <sub>2</sub> (mg·g <sup>-1</sup> ·min <sup>-1</sup> ) | 88.20  | 105.80                  |
|                         | R <sub>2</sub> <sup>2</sup>                             | 0.9006 | 0.9763                  |
|                         | K <sub>3dif</sub> (mg·g <sup>-1</sup> )                 | 0.0702 | 0.4449                  |
|                         | C <sub>3</sub> (mg·g <sup>-1</sup> ·min <sup>-1</sup> ) | 96.41  | 122.29                  |
|                         | R <sub>3</sub> <sup>2</sup>                             | 0.9170 | 0.9740                  |

**Table S5.** Comparison of photocatalytic performance of recent reported photocatalysts for the

degradation of MNZ or TCH.

| Samples                                                               | Light sources                              | Pollutant | Degradation efficiencies | Concentration (mg·L <sup>-1</sup> ) | Dosage (g·L <sup>-1</sup> ) | Refs.     |
|-----------------------------------------------------------------------|--------------------------------------------|-----------|--------------------------|-------------------------------------|-----------------------------|-----------|
| ZnO                                                                   | Ultraviolet light                          | MNZ       | 63.00% (30min)           | 10                                  | 0.3                         | 1         |
| ZnO/PiC                                                               | Visible light ( $\lambda > 420\text{nm}$ ) | MNZ       | 97.50% (40min)           | 10                                  | 0.2                         | 2         |
| P-doped g <sub>3</sub> N <sub>4</sub> /Co <sub>3</sub> O <sub>4</sub> | Visible light ( $\lambda > 420\text{nm}$ ) | MNZ       | 68.90% (180min)          | 10                                  | 1.0                         | 3         |
| Zn <sub>3</sub> In <sub>2</sub> S <sub>6</sub> /AgBr                  | Visible light ( $\lambda > 420\text{nm}$ ) | MNZ       | 98.20% (120min)          | 10                                  | 0.5                         | 4         |
| B-TiO <sub>2</sub> /BiVO <sub>4</sub>                                 | Visible light ( $\lambda > 420\text{nm}$ ) | TCH       | 89.30 % (120 min)        | 20                                  | 0.5                         | 5         |
| Ce-CdIn <sub>2</sub> S <sub>4</sub>                                   | Visible light ( $\lambda > 420\text{nm}$ ) | TCH       | 85.60 % (120 min)        | 50                                  | 0.5                         | 6         |
| Ag <sub>2</sub> O/ZnIn <sub>2</sub> S <sub>4</sub>                    | Visible light ( $\lambda > 420\text{nm}$ ) | TCH       | 83.66% (100 min)         | 10                                  | 0.35                        | 7         |
| SnS <sub>2</sub> @ZnIn <sub>2</sub> S <sub>4</sub> @kaolinite         | Visible light ( $\lambda > 420\text{nm}$ ) | TCH       | 88.23% (60min)           | 40                                  | 0.2                         | 8         |
| La <sub>1.37</sub> -ZIS                                               | Visible light ( $\lambda > 420\text{nm}$ ) | MNZ       | 97.20% (80min)           | 60                                  | 0.33                        | This work |
| La <sub>1.37</sub> -ZIS                                               | Visible light ( $\lambda > 420\text{nm}$ ) | TCH       | 87.60% (40min)           | 80                                  | 0.33                        | This work |

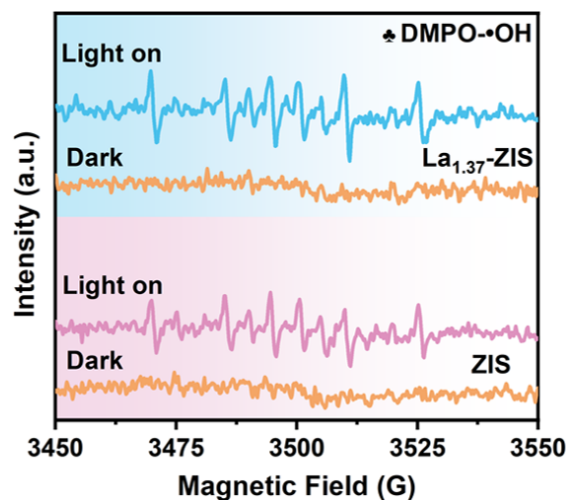

Fig. S12 DMPO·OH generated by ZIS and La<sub>1.37</sub>-ZIS in the dark and under visible light



irradiation.

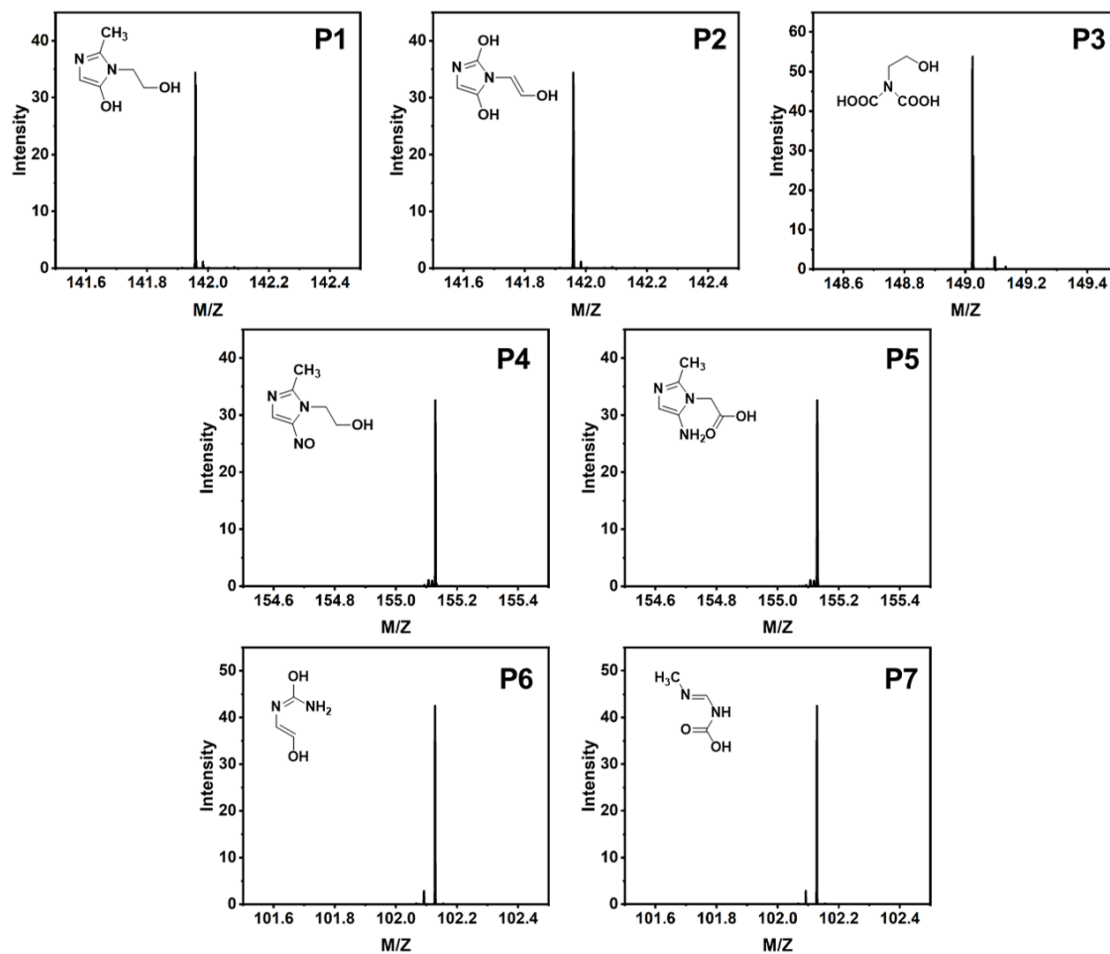

Fig. S13 Possible intermediates in the photocatalytic degradation of MNZ by La<sub>1.37</sub>-ZIS.

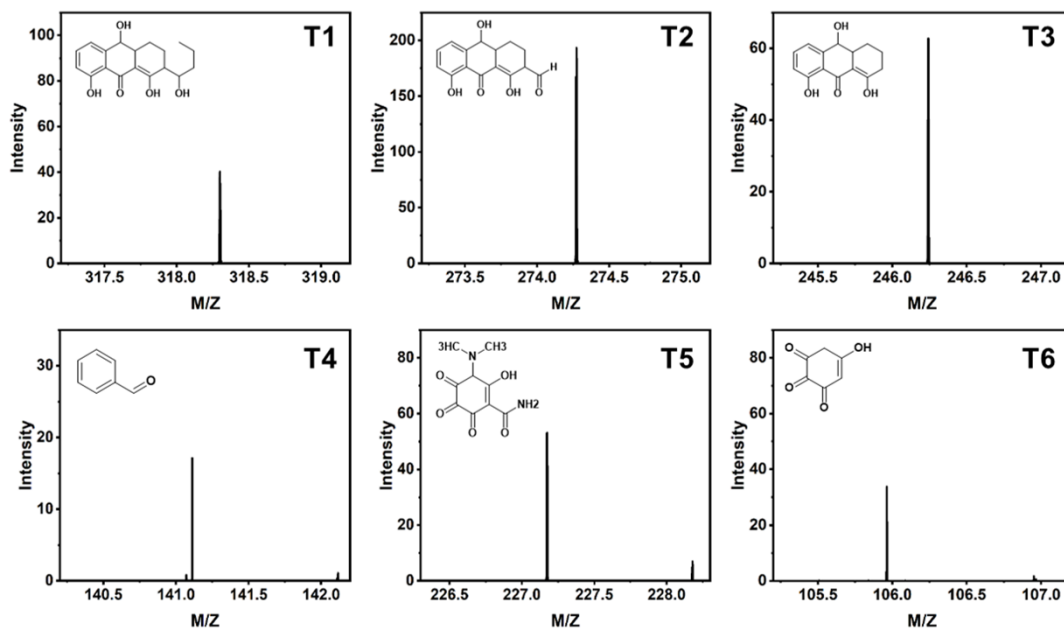

Fig. S14 Possible intermediates in the photocatalytic degradation of TCH by La<sub>1.37</sub>-ZIS.

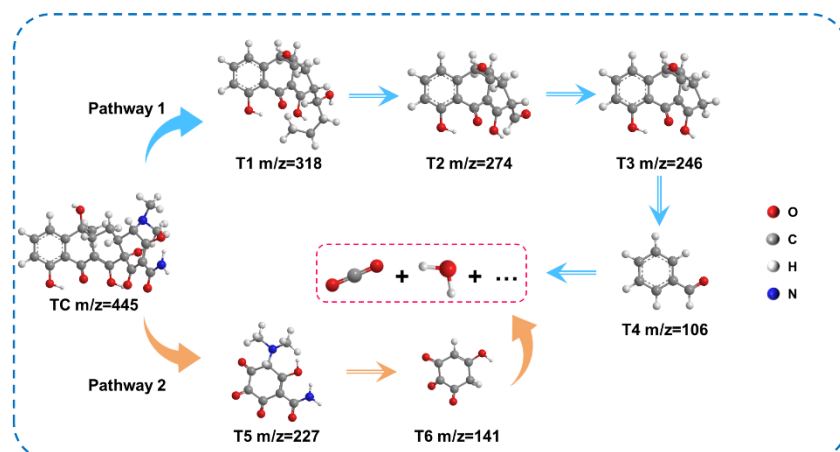

**Fig. S15** Proposed photocatalytic degradation pathways of TCH over  $\text{La}_{1.37}\text{-ZIS}$ .

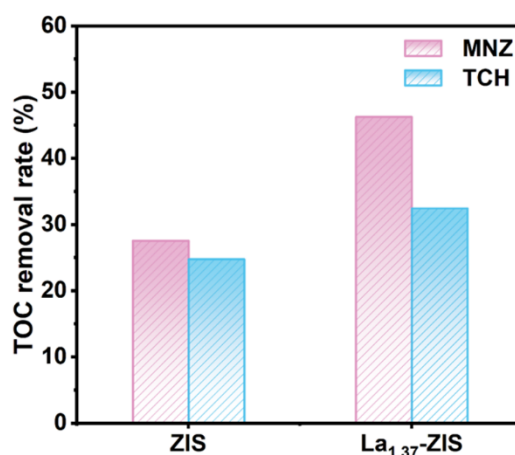

**Fig. S16** TOC removal rate of MNZ and TCH by ZIS and  $\text{La}_{1.37}\text{-ZIS}$ .

## Supplementary References

1. M. L. Tran, C.-C. Fu and R.-S. Juang, Removal of metronidazole by  $\text{TiO}_2$  and  $\text{ZnO}$  photocatalysis: a comprehensive comparison of process optimization and transformation products, *Environ. Sci. Pollut. Res.*, 2018, **25**, 28285-28295.
2. H. Cai, D. Zhang, X. Ma and Z. Ma, A novel  $\text{ZnO}$ /biochar composite catalysts for visible light degradation of metronidazole, *Sep. Purif. Technol.*, 2022, **288**, 120633.
3. Z. Zhao, J. Fan, X. Deng and J. Liu, One-step synthesis of phosphorus-doped  $\text{g-C}_3\text{N}_4/\text{Co}_3\text{O}_4$  quantum dots from vitamin B12 with enhanced visible-light photocatalytic activity for metronidazole degradation, *Chem. Eng. J.*, 2019, **360**, 1517-1529.
4. J. Sun, Y. Hou, Z. Yu, L. Tu, Y. Yan, S. Qin, S. Chen, D. Lan, H. Zhu and S. Wang, Visible-light-driven Z-scheme  $\text{Zn}_3\text{In}_2\text{S}_6/\text{AgBr}$  photocatalyst for boosting simultaneous  $\text{Cr(VI)}$  reduction and metronidazole

- oxidation: Kinetics, degradation pathways and mechanism, *J. Hazard. Mater.*, 2021, **419**, 126543.
5. C. Wu, J. Dai, J. Ma, T. Zhang, L. Qiang and J. Xue, Mechanistic study of B-TiO<sub>2</sub>/BiVO<sub>4</sub> S-scheme heterojunction photocatalyst for tetracycline hydrochloride removal and H<sub>2</sub> production, *Sep. Purif. Technol.*, 2023, **312**, 123398.
  6. F. Wang, W. Zhang, H. Liu, R. Cao and M. Chen, Roles of CeO<sub>2</sub> in preparing Ce-doped CdIn<sub>2</sub>S<sub>4</sub> with boosted photocatalytic degradation performance for methyl orange and tetracycline hydrochloride, *Chemosphere*, 2023, **338**, 139574.
  7. Y. Xiao, Z. Peng, W. Zhang, Y. Jiang and L. Ni, Self-assembly of Ag<sub>2</sub>O quantum dots on the surface of ZnIn<sub>2</sub>S<sub>4</sub> nanosheets to fabricate p-n heterojunctions with wonderful bifunctional photocatalytic performance, *Appl. Surf. Sci.*, 2019, **494**, 519-531.
  8. Y. Li, B. Yu, Z. Hu and H. Wang, Construction of direct Z-scheme SnS<sub>2</sub>@ZnIn<sub>2</sub>S<sub>4</sub>@kaolinite heterostructure photocatalyst for efficient photocatalytic degradation of tetracycline hydrochloride, *Chem. Eng. J.*, 2022, **429**, 132105.
